# Supplementary material for: Randomizing of Oligopeptide Conformations by Nearest Neighbor Interactions between Amino Acid Residues
Source: MDPI journal article supplement (doi:10.3390/biom12050684), 2022-05-11
Supplement: s1 [file s1]

# **Randomization of Oligopeptide Conformations by Nearest Neighbor Interactions between Amino Acid Residues**

*Reinhard Schweitzer-Stenner,<sup>1\*</sup> Harald Schwalbe<sup>2</sup> and Bridget  
Milorey<sup>1</sup>*

<sup>1</sup>Department of Chemistry, Drexel University, Philadelphia, PA 19104,  
USA and <sup>2</sup>Institut für Organische Chemie und Chemische Biologie,  
Johann Wolfgang Goethe Universität, 60438 Frankfurt, Germany

## **Supporting Information**

\*Corresponding author: Reinhard Schweitzer-Stenner, Phone:  
215-895-2268; Email: [rs344@drexel.edu](mailto:rs344@drexel.edu)

| J-coupling constants [Hz]              | GAFG                        | GAFG                     | GFAG                      | GFAG                     |
|----------------------------------------|-----------------------------|--------------------------|---------------------------|--------------------------|
| <b><math>^3J(H^NH^{\alpha})</math></b> | Exp: 6.24<br>Gauss: 6.08    | Exp: 7.67<br>Gauss: 7.78 | Exp: 6.92<br>Gauss: 6.98  | Exp: 7.02<br>theo: 6.81  |
| <b><math>^3J(H^NC')</math></b>         | Exp: 1.21<br>Gauss: 1.04    | Exp: 0.33<br>Gauss: 0.76 | Exp: 1.01<br>Gauss: 0.97  | Exp: 1.14<br>Gauss: 1.03 |
| <b><math>^3J(H^{\alpha}C')</math></b>  | Exp: 2.2<br>Gauss: 2.4<br>2 | Exp: 2.48<br>Gauss: 2.43 | Exp: 2.22<br>Gauss: 2.24  | Exp: 2.08<br>Gauss: 2.24 |
| <b><math>^3J(H^NH^{\beta})</math></b>  | Exp: 1.94<br>Gauss: 1.96    | Exp: 1.26<br>Gauss: 1.38 | Exp: 1.81<br>Gauss: 1.65  | Exp: 2.06<br>Gauss: 1.63 |
| <b><math>^1J(H^NH^{\alpha})</math></b> | -                           |                          | Exp: 11.7<br>Gauss: 11.63 | Exp: 11.3<br>Gauss: 11.4 |
| $\chi^2$                               | 5.49                        | 8.17                     | 0.2                       | 1.67                     |

**Table S1:** Experimental and calculated (Gauss) J-coupling constants of the indicated residues of the cationic tetrapeptides GAFG and GFAG. The respective residues are typed in bold in the header. The reduced chi-square value of the fits are listed at the bottom of the table.

| Basins                           | GAG        | GAFG       | GFAG       | GFG        | GFAG       | GAFG       |
|----------------------------------|------------|------------|------------|------------|------------|------------|
| <b>pII</b>                       | -72°,150°  | -73°,150°  | -73°,150°  | -77°,155°  | -72°,152°  | -74°,152°  |
| <b><math>\beta</math>-strand</b> | -115°,150° | -120°,150° | -115°,150° | -115°,155° | -120°,150° | -115°,150° |
| <b>iy</b>                        | -60°,60°   | -60°,60°   | -60°,60°   | -80°,60°   | -80°,60°   | -80°,60°   |
| <b>rh</b>                        | -60°,-30°  | -60°,-30°  | -60°,-30°  | -65°,-20°  | -65°,-30°  | -65°,-30°  |
| <b>lh/y</b>                      | 60°,-60°   | 70°,50°    | 70°,50°    | 80°,20°    | 75°, 60°   | 80°,60°    |

**Table S2:** Positions of Gaussian sub-distributions representing basins in the Ramachandran plot of the indicated peptides

| J-coupling constants [Hz]                                     | GKKG                       | GKKG                       |
|---------------------------------------------------------------|----------------------------|----------------------------|
| <b><math>^3J(\text{H}^{\text{N}}\text{H}^{\alpha})</math></b> | Exp: 6.42<br>Gauss: 6.47   | Exp: 7.05<br>Gauss: 6.93   |
| <b><math>^3J(\text{H}^{\text{N}}\text{C}')</math></b>         | Exp: 0.91<br>Gauss: 0.96   | Exp: 1.11<br>Gauss: 1.96   |
| <b><math>^3J(\text{H}^{\alpha}\text{C}')</math></b>           | Exp: 1.95<br>Gauss: 2.0    | Exp: 1.75<br>Gauss: 1.97   |
| <b><math>^3J(\text{H}^{\text{N}}\text{H}^{\beta})</math></b>  | Exp: 1.83<br>Gauss: 1.96   | Exp: 1.54<br>Gauss: 1.38   |
| <b><math>^1J(\text{H}^{\text{N}}\text{H}^{\alpha})</math></b> | Exp: 11.79<br>Gauss: 11.72 | Exp: 11.60<br>Gauss: 11.60 |
| $\chi^2$                                                      | 0.25                       | 0.72                       |

**Table S3:** Experimental and calculated (Gauss) J-coupling constants of the indicated residues of the cationic tetrapeptide GKKG. The respective residues are typed in bold in the header. The reduced chi-square value of the fits are listed at the bottom of the table.

| Conformation                         | GK<br>G | GKK<br>G | GKK<br>G |
|--------------------------------------|---------|----------|----------|
| <b>pPII</b>                          | 0.5     | 0.81     | 0.54     |
| <b><math>\beta</math>-strand</b>     | 0.41    | 0.156    | 0.46     |
| <b>iy/type II <math>\beta</math></b> | 0.0     | 0.04     | 0        |
| <b>rh</b>                            | 0.09    | 0        | 0        |
| <b>lh/y</b>                          | 0.0     | 0.14     | 0        |

**Table S4:** List of statistical weights of conformations constituting the Ramachandran plots of the indicated peptides.

| Basins          | GK<br>G    | GKK<br>G   | GKK<br>G   |
|-----------------|------------|------------|------------|
| pPII            | -66°,150°  | -74°,155°  | -66°,150°  |
| $\beta$ -strand | -115°,145° | -115°,155° | -115°,150° |
| iy              |            | -60°,30°   | -20°,20°   |
| rh              | -65°,-30°  | -65°,-30°  | -65°,-30°  |
| lh/y            |            | 60°,30°    | 20°,-50°   |

**Table S5:** Positions of Gaussian sub-distributions representing basins in the Ramachandranplot of the indicated peptides.

|              | pPII | $\beta$ -strand | rh+iy+type I' $\beta$ | lh+ $\gamma$ |
|--------------|------|-----------------|-----------------------|--------------|
| <b>GA*G</b>  | 0.80 | 0.10            | 0.06                  | 0.04         |
| <b>GA*AG</b> | 0.76 | 0.14            | 0.10                  | 0.00         |
| <b>GAA*G</b> | 0.78 | 0.13            | 0.09                  | 0.00         |
| <b>AA*AA</b> | 0.90 | 0.00            | 0.00                  | 0.10         |
| <b>AAA*A</b> | 0.88 | 0.00            | 0.00                  | 0.12         |

|               | pPII | $\beta$ -strand | rh+iy+type I' $\beta$ | asx-turn |
|---------------|------|-----------------|-----------------------|----------|
| <b>GD*G</b>   | 0.30 | 0.39            | 0.09                  | 0.23     |
| <b>GD*DG</b>  | 0.28 | 0.28            | 0.21                  | 0.23     |
| <b>GDD*G</b>  | 0.12 | 0.61            | 0.20                  | 0.06     |
| <b>GD*DDG</b> | 0.27 | 0.38            | 0.13                  | 0.22     |
| <b>GDD*DG</b> | 0.33 | 0.30            | 0.37                  | 0.00     |
| <b>GDDD*G</b> | 0.31 | 0.34            | 0.21                  | 0.15     |

|               | pPII | $\beta$ -strand | rh+iy+type I' $\beta$ | asx-turn |
|---------------|------|-----------------|-----------------------|----------|
| <b>GR*G</b>   | 0.58 | 0.20            | 0.14                  | 0.08     |
| <b>GR*RG</b>  | 0.69 | 0.16            | 0.15                  | 0.01     |
| <b>GRR*G</b>  | 0.45 | 0.33            | 0.22                  | 0.00     |
| <b>GR*RRG</b> | 0.69 | 0.29            | 0.02                  | 0.00     |
| <b>GRR*RG</b> | 0.39 | 0.44            | 0.16                  | 0.00     |
| <b>GRRR*G</b> | 0.53 | 0.38            | 0.09                  | 0.00     |

**Table S6:** Statistical weight of the indicated conformations in the Ramachandran plots of alanine, aspartic acid and arginine based homopeptide sequences. Values were taken from ref. [43–45,51]

|             | $\delta G_{pP_{II}\beta,12}$ | $\delta G_{\beta pP_{II},12}$ | $\delta G_{pP_{II}\beta,21}$ | $\delta G_{\beta pP_{II},21}$ |
|-------------|------------------------------|-------------------------------|------------------------------|-------------------------------|
| <b>GRRG</b> | 2.2±0.5                      | 1.0±0.3                       | -0.1±0.3                     | 2.0±0.3                       |

|             | $\delta G_{tlpP_{II},12}$ | $\delta G_{tlpP_{II},21}$ |
|-------------|---------------------------|---------------------------|
| <b>GRRG</b> | 2.7±1.0                   | 1.7±0.8                   |

|              | $\delta G_{pP_{II}\beta,12}$ | $\delta G_{\beta pP_{II},12}$ | $\delta G_{pP_{II}\beta,23}$ | $\delta G_{\beta pP_{II},23}$ | $\delta G_{pP_{II}\beta,32}$ | $\delta G_{\beta pP_{II},32}$ |
|--------------|------------------------------|-------------------------------|------------------------------|-------------------------------|------------------------------|-------------------------------|
| <b>GRRRG</b> | 0.8±0.7                      | 1.6±0.6                       | 0.1±0.6                      | 0.7±0.6                       | -1.1±0.7                     | 1.4±0.6                       |

|             | $\delta G_{pP_{II}\beta,12}$ | $\delta G_{\beta pP_{II},12}$ | $\delta G_{pP_{II}\beta,21}$ | $\delta G_{\beta pP_{II},21}$ |
|-------------|------------------------------|-------------------------------|------------------------------|-------------------------------|
| <b>GDDG</b> | 0.2±0.5                      | -0.5±0.5                      | -2.7±0.6                     | 1±0.6                         |

|             | $\delta G_{tlpP_{II},12}$ | $\delta G_{tlpP_{II},21}$ |
|-------------|---------------------------|---------------------------|
| <b>GDDG</b> | 1.8±1.0                   | 2.0±0.8                   |

|              | $\delta G_{pP_{II}\beta,12}$ | $\delta G_{\beta pP_{II},12}$ | $\delta G_{pP_{II}\beta,23}$ | $\delta G_{\beta pP_{II},23}$ | $\delta G_{pP_{II}\beta,32}$ | $\delta G_{\beta pP_{II},32}$ |
|--------------|------------------------------|-------------------------------|------------------------------|-------------------------------|------------------------------|-------------------------------|
| <b>GDDDG</b> | 0.2±0.5                      | 0.2±0.5                       | 3.8±0.5                      | 0.7±0.4                       | -0.6±0.5                     | -0.7±0.4                      |

|              | $\delta G_{tlpP_{II},12}$ | $\delta G_{tlpP_{II},21}$ |
|--------------|---------------------------|---------------------------|
| <b>GDDDG</b> | 1.1±1.0                   | 2.0±0.8                   |

**Table S7:** Parameters reflecting nearest neighbor interactions in the indicated peptides. In addition to pP<sub>II</sub>- $\beta$  NNIs we list some interaction parameters involving right-handed helical and turn conformations for which the statistical error is not larger than the value itself.

| <b>x,y</b> | $\delta G_{pP\text{II}\beta,12}$ | $\delta G_{\beta p\text{P}\text{II},12}$ | $\delta G_{pP\text{II}\beta,21}$ | $\delta G_{\beta p\text{P}\text{II},21}$ | $\delta G_{pP\text{II}t,12}$ | $\delta G_{t\text{lpP}\text{II},12}$ | $\delta G_{pP\text{II}t,21}$ | $\delta G_{t\text{lpP}\text{II},21}$ |
|------------|----------------------------------|------------------------------------------|----------------------------------|------------------------------------------|------------------------------|--------------------------------------|------------------------------|--------------------------------------|
| <b>AV</b>  | $-2.9 \pm 0.5$                   | $3.2 \pm 0.5$                            | $0.7 \pm 0.3$                    | $0.3 \pm 0.5$                            | $1.3 \pm 0.6$                | $1.7 \pm 1.0$                        | -                            | -                                    |
| <b>DA</b>  | $-0.1 \pm 0.4$                   | $1.1 \pm 0.3$                            | $-2.6 \pm 0.4$                   | $0.3 \pm 0.5$                            | -                            | -                                    | $-2.0 \pm 1.0$               | -                                    |
| <b>AL</b>  | $-0.3 \pm 0.5$                   | $3 \pm 0.5$                              | $0.1 \pm 0.5$                    | $0.2 \pm 0.4$                            | -                            | -                                    | -                            | -                                    |
| <b>AF</b>  | $2 \pm 0.5$                      | $0.2 \pm 0.3$                            | $-0.9 \pm 0.4$                   | $0.2 \pm 0.5$                            | $4.0 \pm 1.0$                | -                                    | $-1.4 \pm 1.0$               | -                                    |
| <b>FA</b>  | $1.7 \pm 0.5$                    | $0.2 \pm 0.4$                            | $-3 \pm 0.7$                     | $0.5 \pm 0.5$                            | -                            | $-2.0 \pm 1.0$                       | -                            | -                                    |

| <b>x,y</b> | $\delta G_{pP\text{II}\beta,12}$ | $\delta G_{\beta p\text{P}\text{II},12}$ | $\delta G_{(pP\text{II}\beta,21)}$ | $\delta G_{\beta p\text{P}\text{II},21}$ | $\delta G_{pP\text{II}t,12}$ | $\delta G_{t\text{lpP}\text{II},12}$ | $\delta G_{pP\text{II}t,21}$ | $\delta G_{t\text{lpP}\text{II},21}$ |
|------------|----------------------------------|------------------------------------------|------------------------------------|------------------------------------------|------------------------------|--------------------------------------|------------------------------|--------------------------------------|
| <b>DA</b>  | $-0.1 \pm 0.4$                   | $1.1 \pm 0.3$                            | $-2.6 \pm 0.4$                     | $0.3 \pm 0.5$                            | -                            | -                                    | $-2.0 \pm 1.0$               | -                                    |
| <b>DV</b>  | $3.1 \pm 0.3$                    | $2.2 \pm 0.3$                            | $0.1 \pm 0.5$                      | $0.4 \pm 0.3$                            | -                            | -                                    | -                            | -                                    |
| <b>DD</b>  | $-0.2 \pm 0.5$                   | $-0.5 \pm 0.5$                           | $-2.7 \pm 0.6$                     | $1.0 \pm 0.7$                            | -                            | $1.8 \pm 1.0$                        | -                            | $2.0 \pm 1.0$                        |
| <b>DL</b>  | $2.7 \pm 0.3$                    | $-2.3 \pm 0.3$                           | $0.6 \pm 0.5$                      | $0.4 \pm 0.5$                            | -                            | -                                    | -                            | -                                    |
| <b>FD</b>  | $6.0 \pm 0.4$                    | $0.7 \pm 0.4$                            | $-0.6 \pm 0.5$                     | $-0.3 \pm 0.6$                           | -                            | $1.5 \pm 1.0$                        | -                            | $1.7 \pm 1.0$                        |
| <b>DF</b>  | $1.6 \pm 0.3$                    | $1.5 \pm 0.3$                            | $-1 \pm 0.4$                       | $0.1 \pm 0.5$                            | -                            | -                                    | -                            | -                                    |

| <b>x,y</b> | $\delta G_{pP\text{II}\beta,12}$ | $\delta G_{\beta p\text{P}\text{II},12}$ | $\delta G_{pP\text{II}\beta,21}$ | $\delta G_{\beta p\text{P}\text{II},21}$ | $\delta G_{pP\text{II}t,12}$ | $\delta G_{t\text{lpP}\text{II},12}$ | $\delta G_{pP\text{II}t,21}$ | $\delta G_{t\text{lpP}\text{II},21}$ |
|------------|----------------------------------|------------------------------------------|----------------------------------|------------------------------------------|------------------------------|--------------------------------------|------------------------------|--------------------------------------|
| <b>AV</b>  | $-2.9 \pm 0.5$                   | $3.2 \pm 0.5$                            | $0.7 \pm 0.3$                    | $0.3 \pm 0.5$                            | $1.3 \pm 0.6$                | $1.7 \pm 1.0$                        | -                            | -                                    |
| <b>SV</b>  | $1.5 \pm 0.4$                    | $2.1 \pm 0.4$                            | $-0.5 \pm 0.4$                   | $0.1 \pm 0.5$                            | -                            | -                                    | -                            | -                                    |
| <b>DV</b>  | $3.1 \pm 0.3$                    | $2.2 \pm 0.3$                            | $0.1 \pm 0.5$                    | $0.4 \pm 0.3$                            | -                            | -                                    | -                            | -                                    |

**Table S8:** Parameters reflecting nearest neighbor interactions in the indicated peptides. In addition to pPII- $\beta$  NNIs we list some interaction parameters involving right-handed helical and turn conformations for which the statistical error is not larger than the value itself.

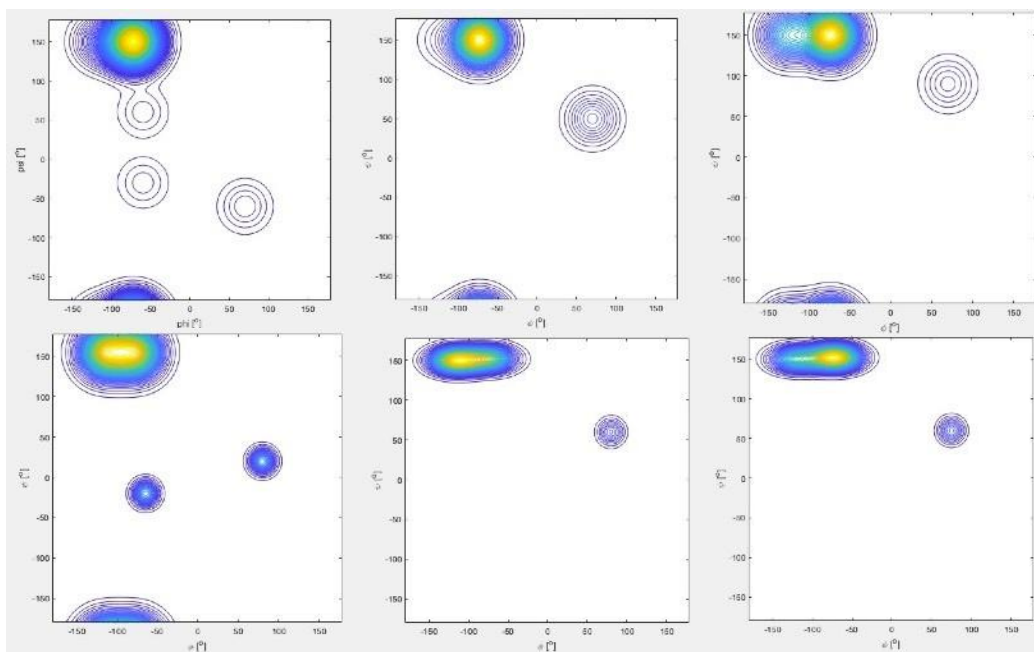

**Figure S1:** Upper panel: Ramachandran plots of GAG (left), GAFG (middle) and GFAG (right); Lower panel: Ramachandran plots of GFG (left), GAFG(middle) and GFAG (left).



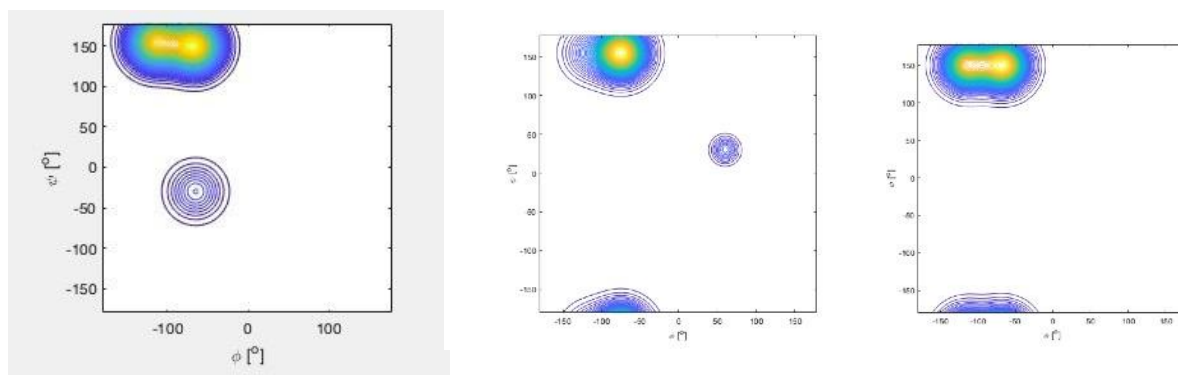

**Figure S2:** Ramachandran plot of GKG (left), GKKG (middle) and GKKG (right).
